# Supplementary material for: Targeting Poly(ADP)ribose polymerase in BCR/ABL1-positive cells
Source: Springer Nature journal article supplement (doi:10.1038/s41598-023-33852-2), 2023-05-10
Supplement: MOESM1 [file 41598_2023_33852_MOESM1_ESM.pdf]

Supplemental Data 1

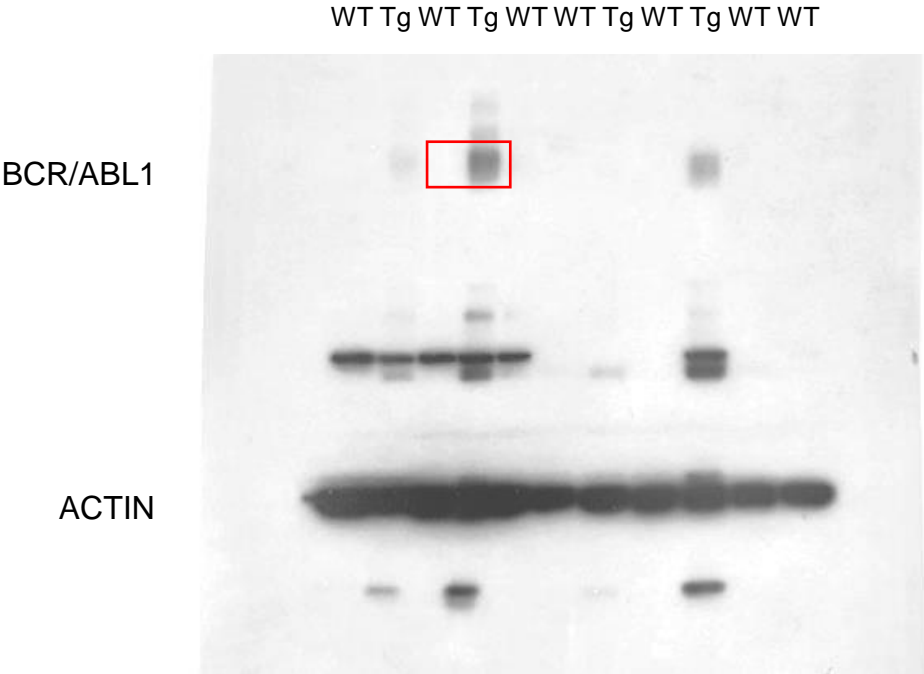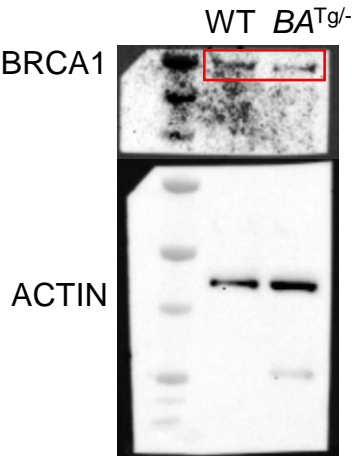

Uncropped images of the blots shown in Figure 1a. The areas enclosed by the red squares are shown in Figure 1a.

# Supplemental Data 2

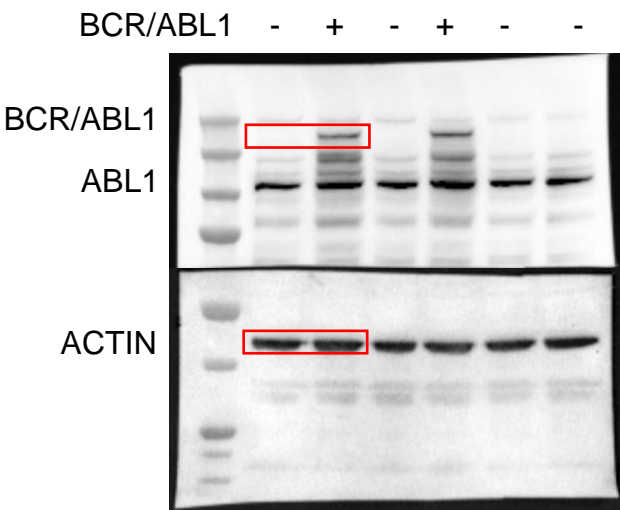

Uncropped image of the blot shown in Supplemental Figure 2a. The areas enclosed by the red squares are shown in Supplemental Fig. 2a.

# Supplemental Data 3

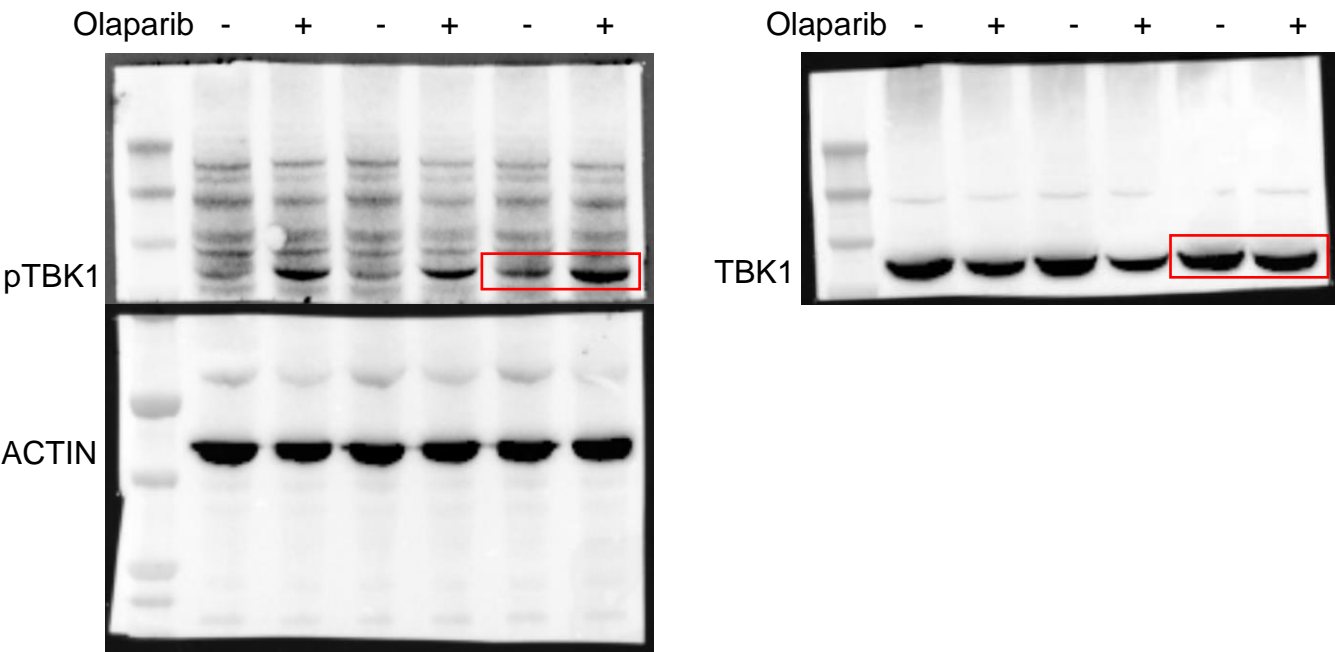

Uncropped image of the blots shown in Figure 3c. The areas enclosed by the red squares are shown in Supplemental Figure 3c.
